# Supplementary material
Source: publisher figshare collection journal article supplement (https://frontiersin.figshare.com/ndownloader/files/35066548)
Supplement: Supplementary file [file 35066548]

Methylcyclohexane (C<sub>7</sub>H<sub>14</sub>)  
Typical fragments (m/z): 41, 55, 69, 83 and 98

Friedman test,  $\chi^2(3) = 2.14$ ,  $p = 0.54$ ,  $n = 14$

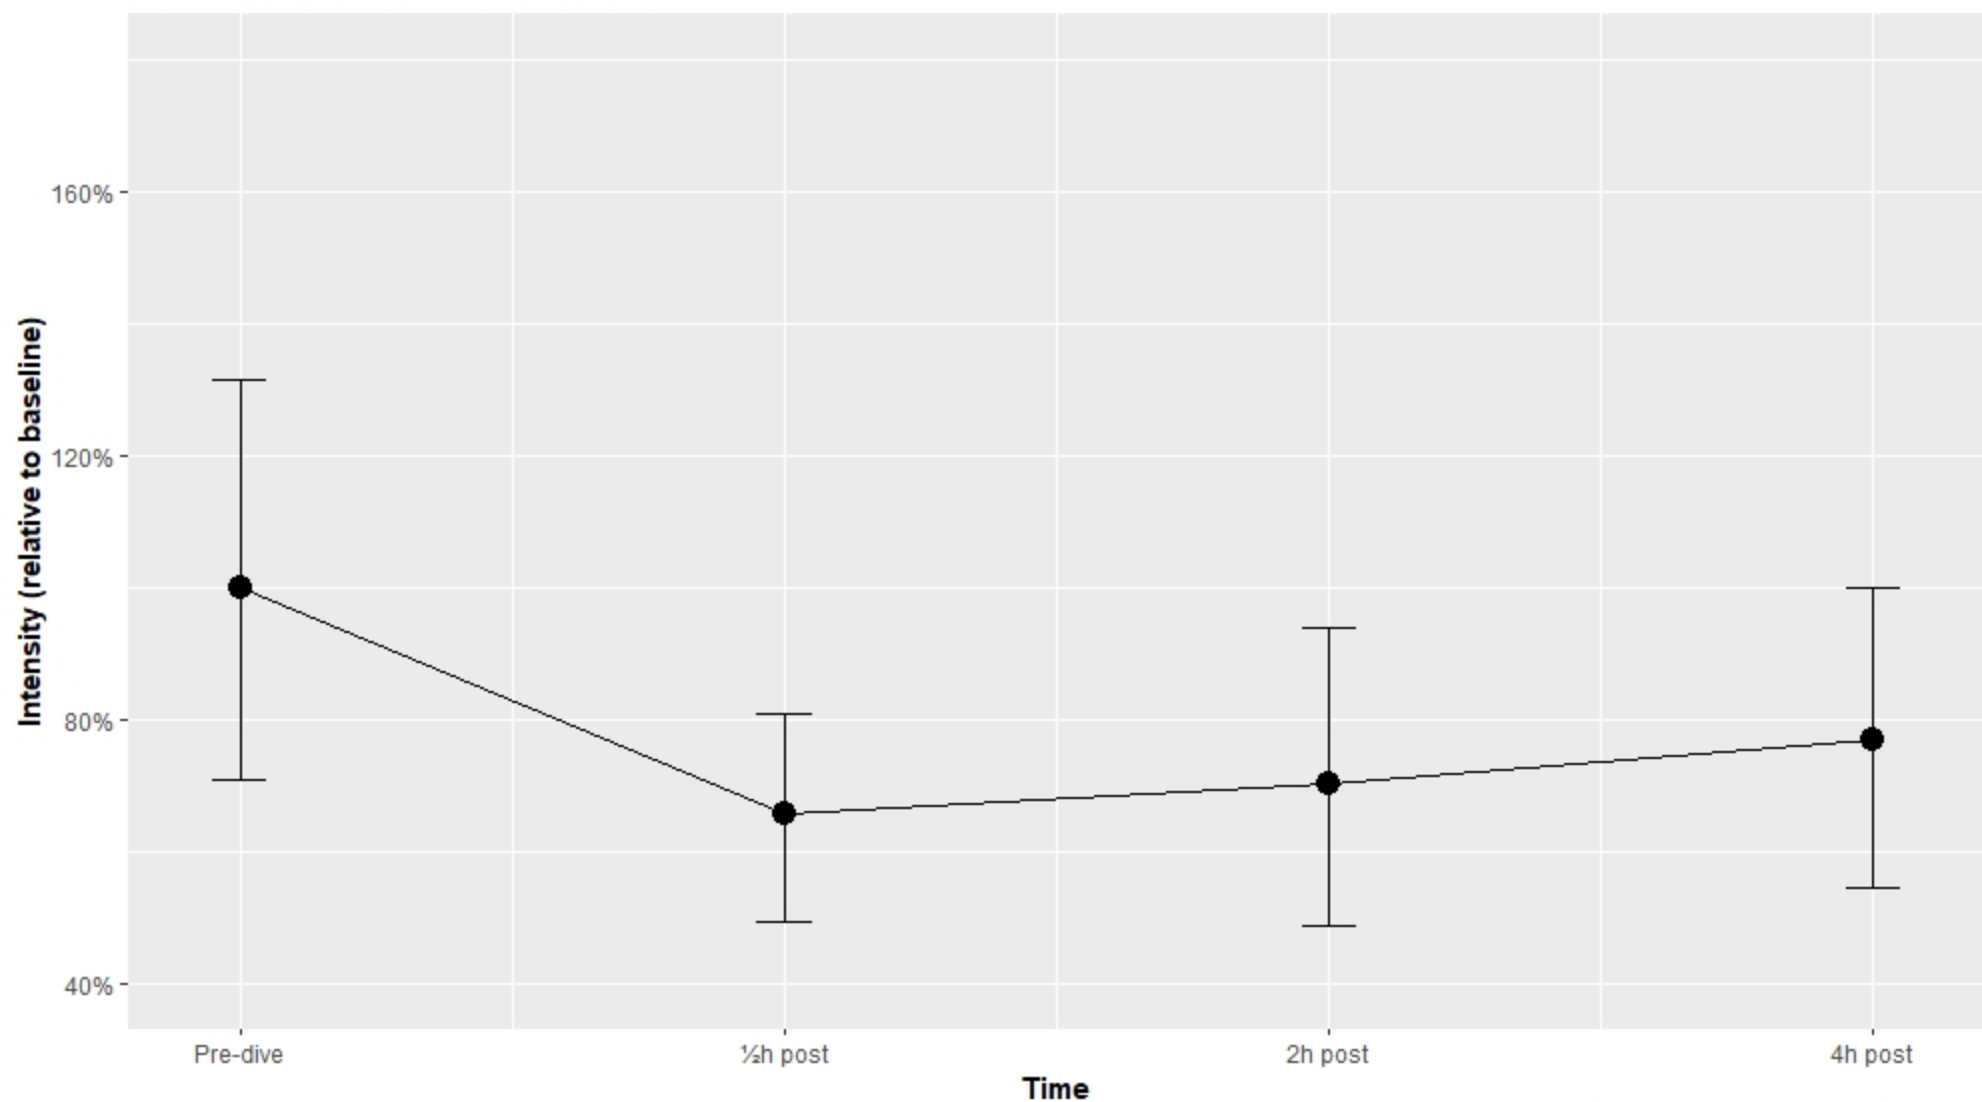

pwc: Wilcoxon test; p.adjust: Bonferroni

3-Methylheptane (C<sub>8</sub>H<sub>18</sub>)

Typical fragments (m/z): 41, 43, 56, 57, 84 and 85

Friedman test,  $\chi^2(3) = 2.83$ ,  $p = 0.42$ ,  $n = 14$

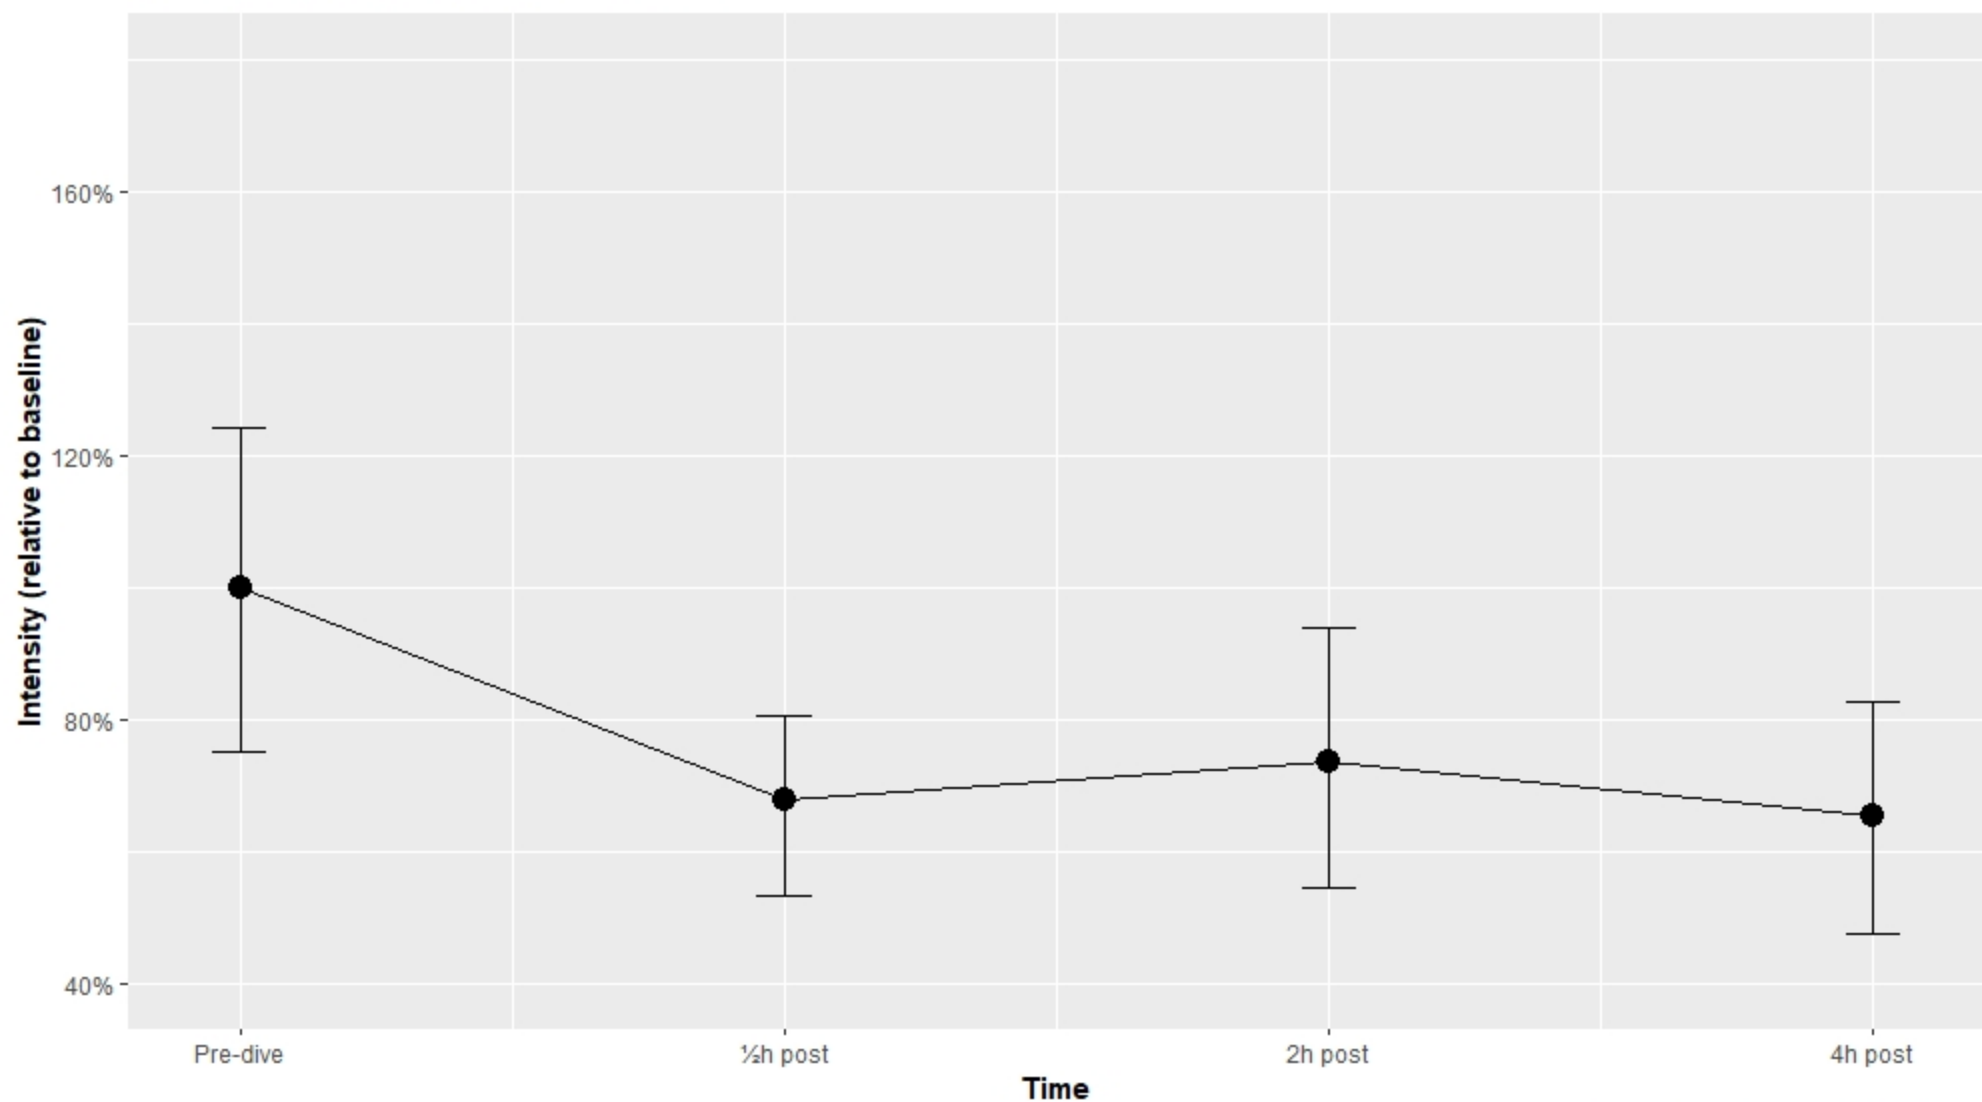

pwc: Wilcoxon test; p.adjust: Bonferroni

3-Methyleneheptane (C<sub>8</sub>H<sub>16</sub>)  
Typical fragments (m/z): 41, 55, and 70

Friedman test,  $\chi^2(3) = 3.17$ ,  $p = 0.37$ ,  $n = 14$

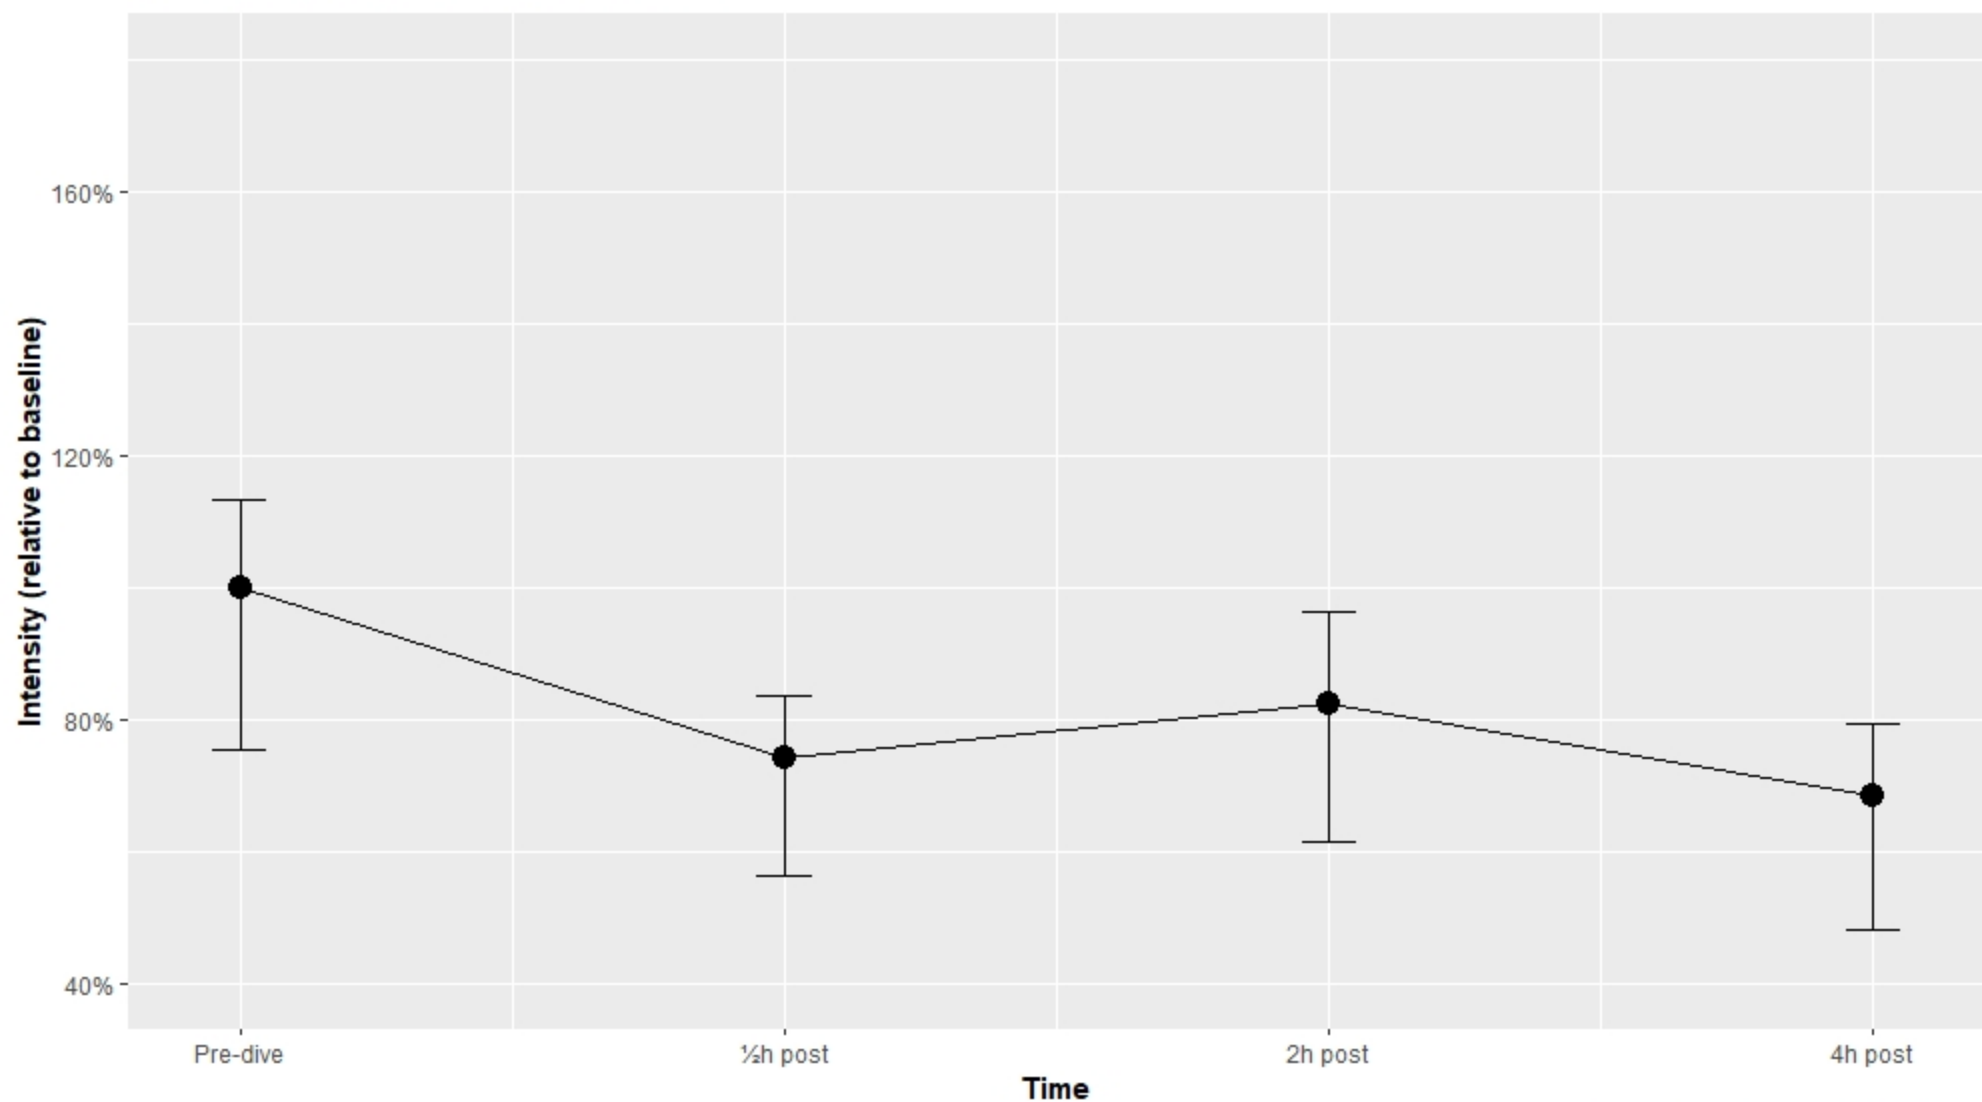

pwc: Wilcoxon test; p.adjust: Bonferroni

Octane (C<sub>8</sub>H<sub>18</sub>)  
Typical fragments (mz): 41, 43, 57, 71, 85 and 114

Friedman test,  $\chi^2(3) = 4.89$ ,  $p = 0.18$ ,  $n = 14$

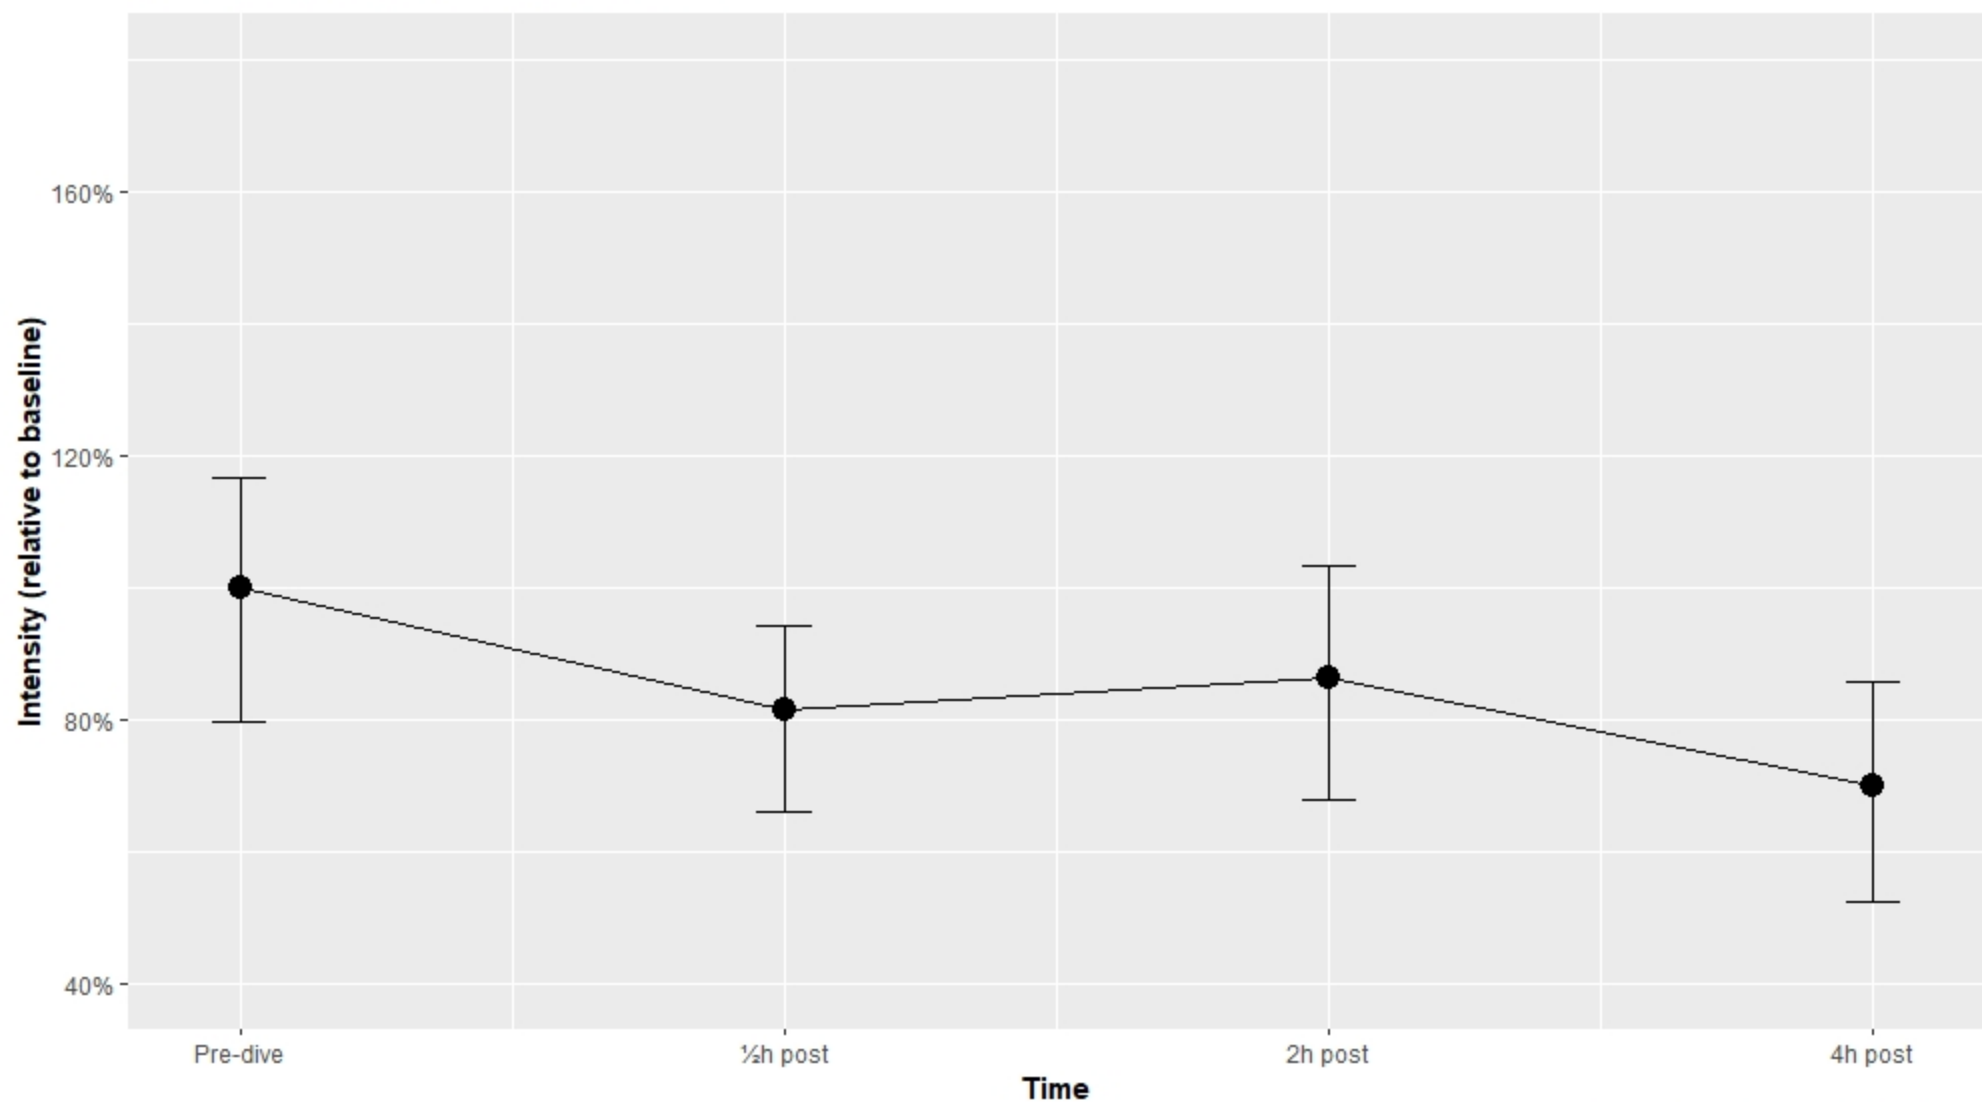

pwc: Wilcoxon test; p.adjust: Bonferroni

3-Methylnonane (C<sub>10</sub>H<sub>22</sub>)  
Typical fragments (m/z): 43, 57, 71, and 112

Friedman test,  $\chi^2(3) = 7.63$ ,  $p = 0.054$ ,  $n = 14$

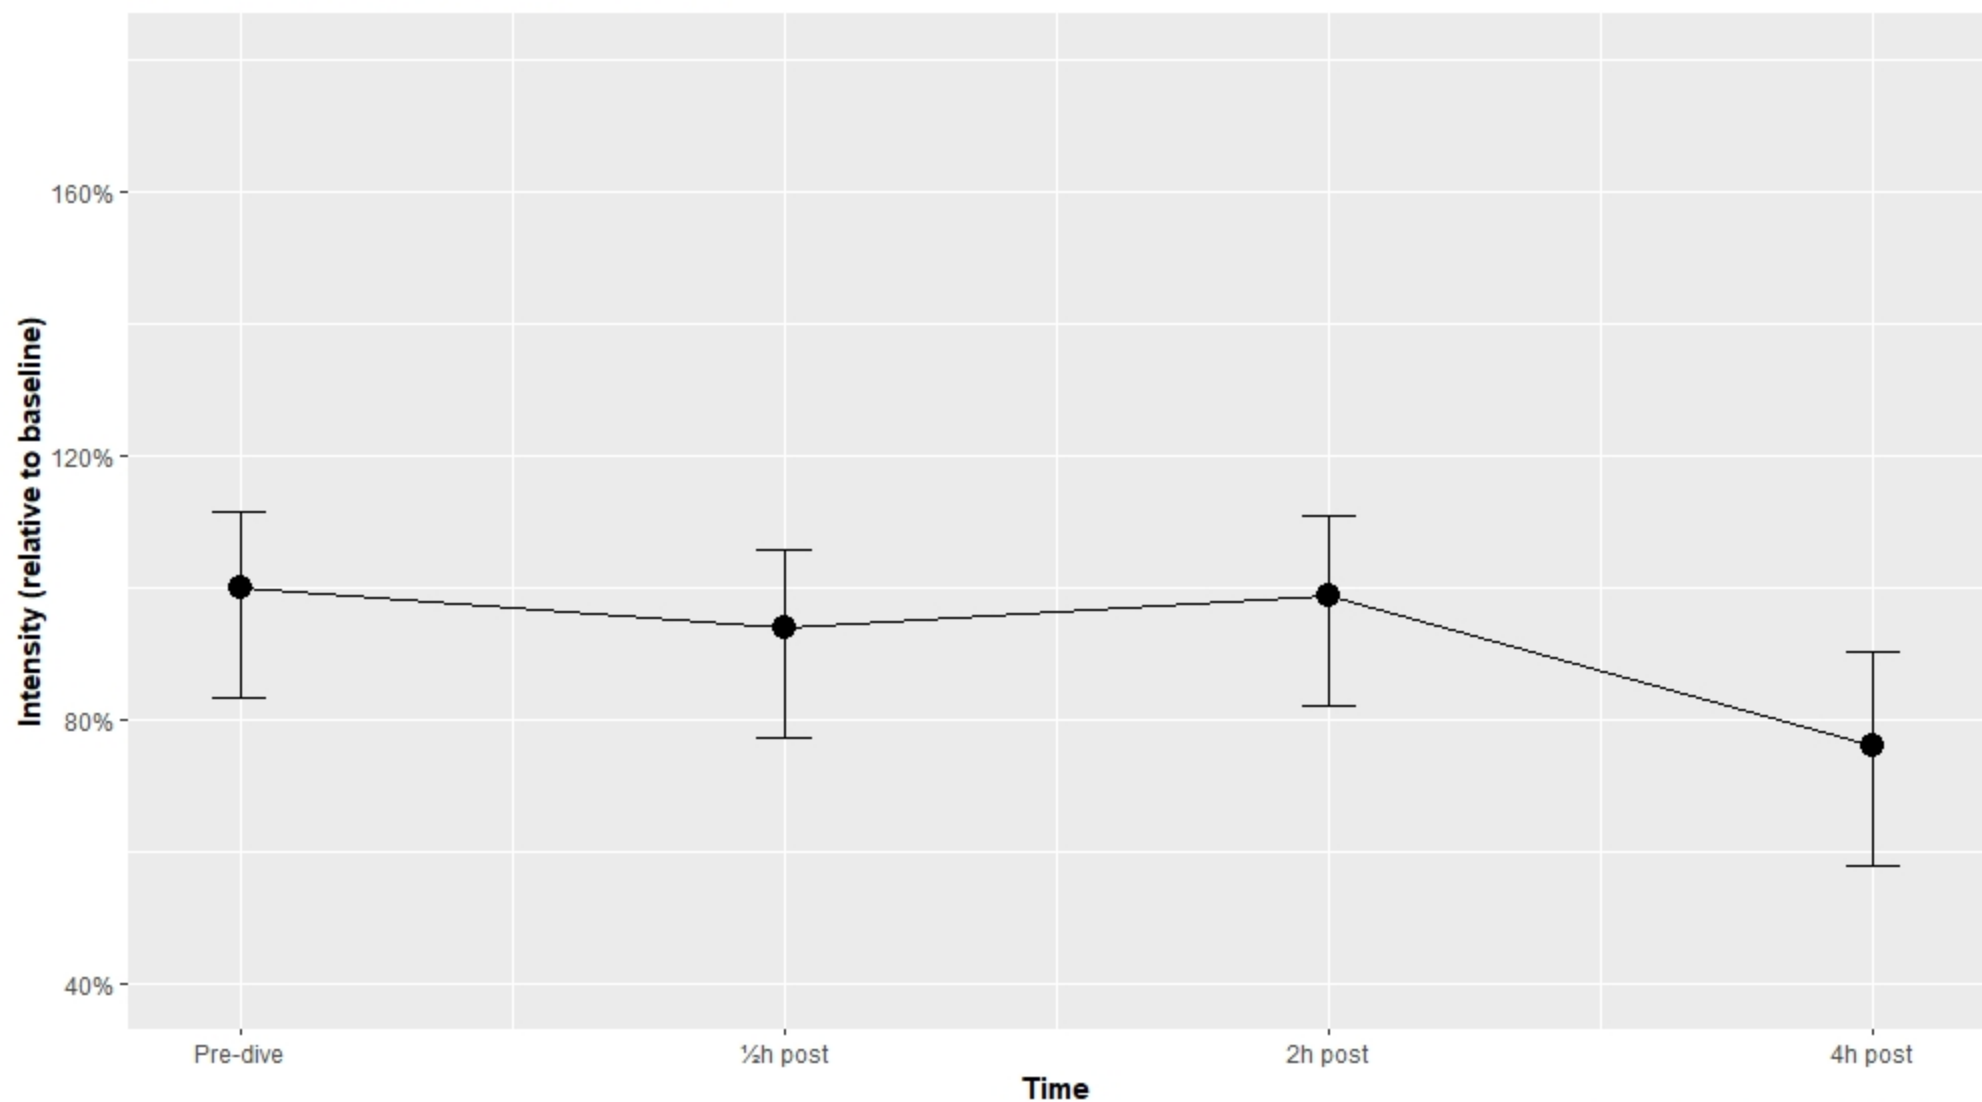

pwc: Wilcoxon test; p.adjust: Bonferroni

Tetradecane (C<sub>14</sub>H<sub>30</sub>)  
Typical fragments (mz): 43, 57, 71, and 85

Friedman test,  $\chi^2(3) = 5.4$ ,  $p = 0.14$ ,  $n = 14$

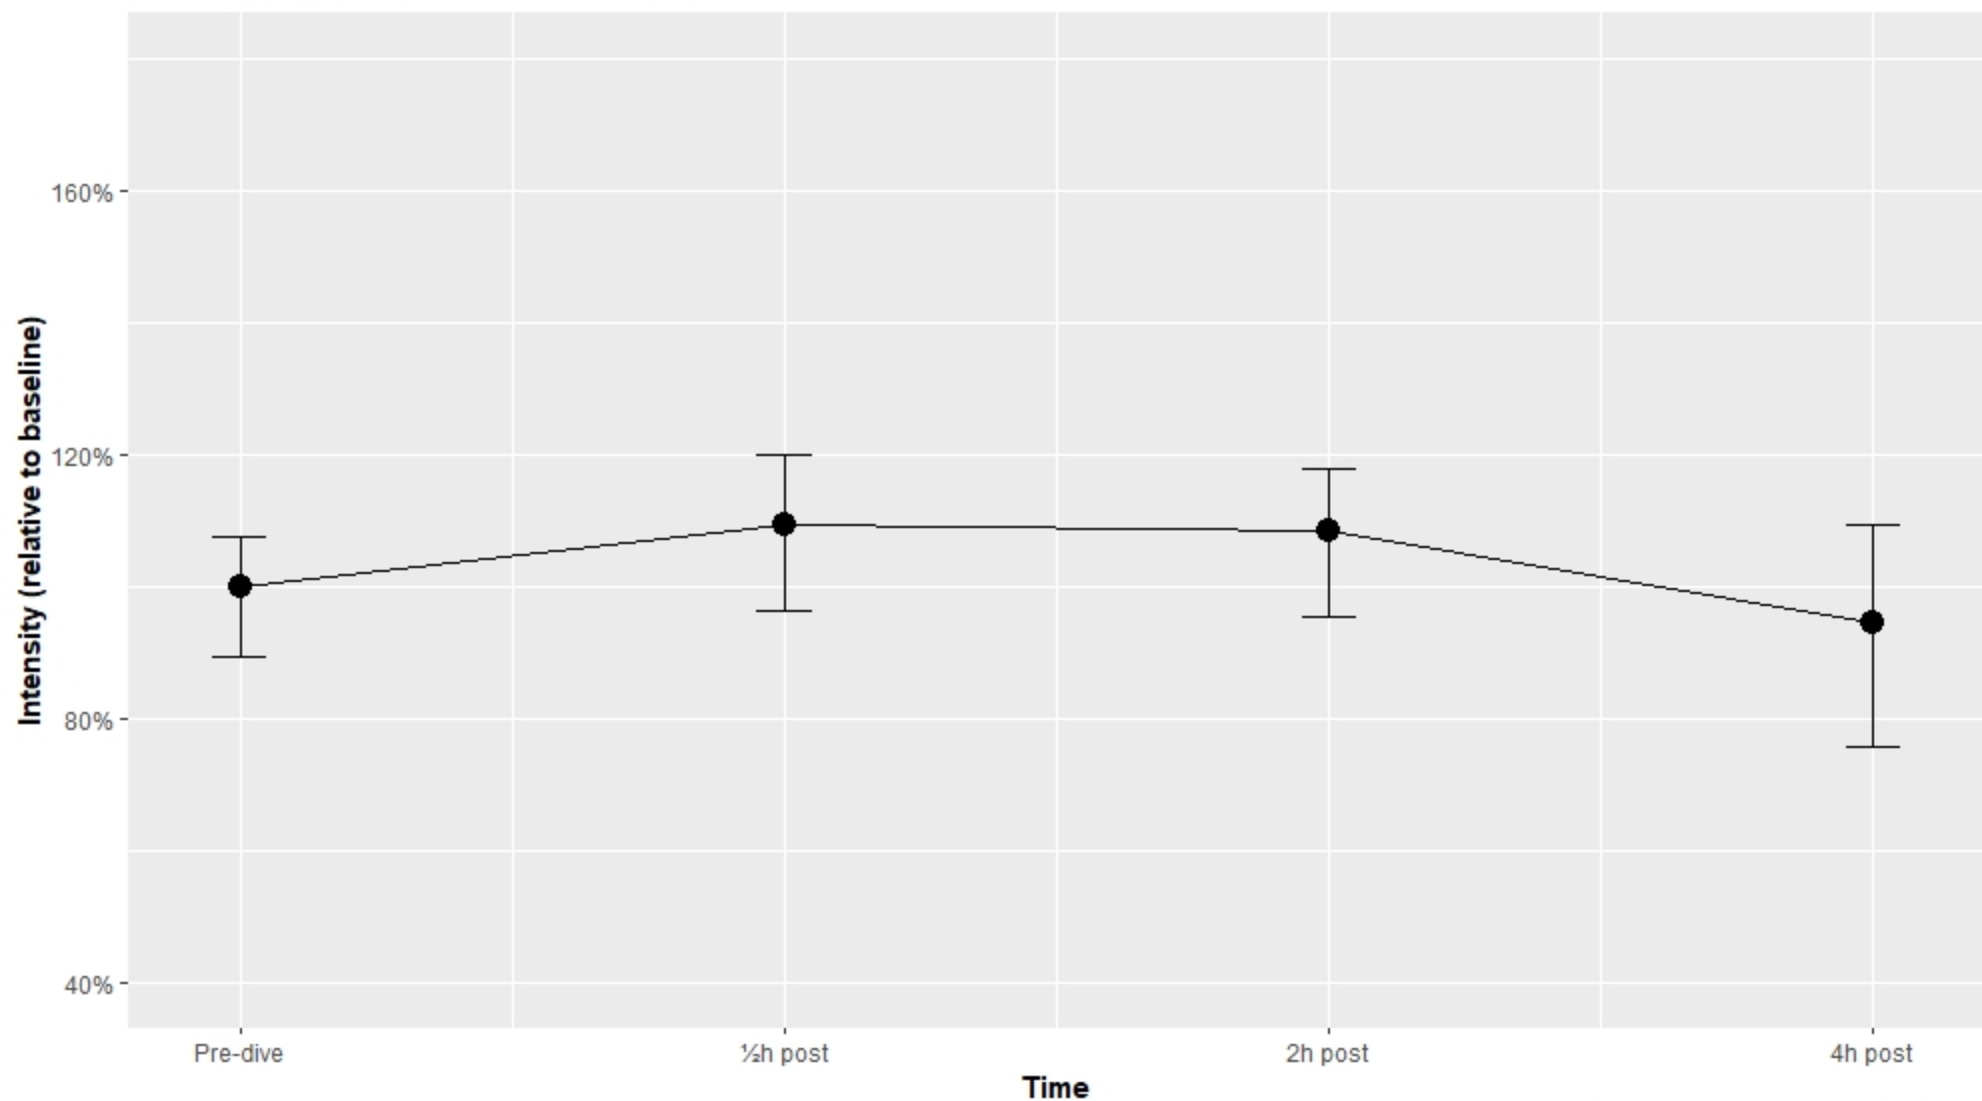

pwc: Wilcoxon test; p.adjust: Bonferroni
